# Supplementary material
Source: PubMed Central journal article supplement (PMC3647984)
Supplement: IAI.01193-12_zii999090086so1.pdf [file IAI.01193-12_zii999090086so1.pdf]

Supplement. Table S1. Putative HP1043 regulon

| Gene, description  |                                                                | Position <sup>a</sup> | -10 element <sup>b</sup> | ATG-distance <sup>c</sup> |
|--------------------|----------------------------------------------------------------|-----------------------|--------------------------|---------------------------|
| HP0095             | Orf                                                            | 100505                | overlap                  | 35                        |
| HP0103             | methyl-accepting chemotaxis protein, <i>tlpB</i>               | 110913                | +11                      | 165                       |
| HP0152             | Orf                                                            | 162929                | +32                      | 72                        |
| HP0160             | Cysteine-rich protein D (cell division)                        | 168772                | +34                      | 109                       |
| HP0188             | Orf                                                            | 195043                | +55                      | 93                        |
| HP0189 (divergent) | conserved hypothetical integral membrane protein               | 195043                | overlap                  | 35                        |
| HP0226             | integral membrane protein                                      | 234836                | no - 10                  | 47                        |
| HP0251             | integral membrane protein of the oligopeptide transport system | 261423                | overlap                  | 18                        |
| HP0305             | Orf                                                            | 323004                | no - 10                  | 129                       |
| HP0330             | ketol-acid reductoisomerase                                    | 345507                | no - 10                  | 30                        |
| HP0372             | deoxycytidine triphosphate deaminase, <i>dcd</i>               | 380210                | overlap                  | 23                        |
| HP0383             | zinc-metallo protease                                          | 393674                | +34                      | 86                        |
| HP0389             | superoxide dismutase, <i>sodB</i>                              | 399246                | no - 10                  | 145                       |
| HP0390 (divergent) | adhesin-thiol peroxidase, <i>tagD</i>                          | 399246                | no - 10                  | 54                        |
| HP0404             | protein kinase C inhibitor                                     | 416658                | overlap                  | 43                        |
| HP0427             | Orf                                                            | 444758                | no - 10                  | 130                       |
| HP0437             | IS605 transposase, <i>tnpA</i>                                 | 454802                | no - 10                  | 16                        |
| HP0438 (divergent) | IS605 transposase, <i>tnpB</i>                                 | 454802                | overlap                  | 24                        |

|                    |                                                                        |        |         |     |
|--------------------|------------------------------------------------------------------------|--------|---------|-----|
| HP0536             | cag pathogenicity island protein, <i>cag15</i>                         | 568544 | overlap | 217 |
| HP0537(divergent)  | cag pathogenicity island protein, <i>cag16</i>                         | 568544 | no -10  | 158 |
| HP0546             | cag pathogenicity island protein, <i>cag25</i>                         | 579174 | no -10  | 60  |
| HP0547             | cag pathogenicity island protein, <i>cag26</i>                         | 579769 | + 8     | 124 |
| HP0588             | subunit of the 2-oxoglutarate oxidoreductase, <i>oorD</i> (TCA cycle)  | 620118 | no -10  | 73  |
| HP0596             | Orf                                                                    | 630195 | no -10  | 36  |
| HP0637             | Orf                                                                    | 684646 | no -10  | 20  |
| HP0638 (divergent) | outer membrane protein, <i>omp13</i>                                   | 684646 | no -10  | 128 |
| HP0639             | Orf                                                                    | 686447 | no -10  | 5   |
| HP0640 (divergent) | poly(A) polymerase, <i>papS</i>                                        | 686447 | overlap | 29  |
| HP0685             | flagella basal body protein, <i>fljP</i>                               | 733967 | +19     | 61  |
| HP0688             | Orf                                                                    | 739341 | +50     | 91  |
| HP0687 (divergent) | iron(II) transport protein, <i>feoB</i>                                | 739341 | no -10  | 18  |
| HP0698             | Orf                                                                    | 750877 | +18     | 51  |
| HP0709             | Orf                                                                    | 762618 | +80     | 163 |
| HP0724             | anaerobic C4-dicarboxylate transport protein, <i>dcuA</i>              | 777526 | no -10  | 48  |
| HP0723 (divergent) | L-asparaginase II, <i>ansB</i>                                         | 777526 | no -10  | 54  |
| HP0767             | Orf                                                                    | 820461 | no -10  | 61  |
| HP0768             | molybdenum cofactor biosynthesis protein A, <i>moaA</i>                | 821491 | no -10  | 21  |
| HP0769 (divergent) | molybdopterin-guanine dinucleotide biosynthesis protein A, <i>mobA</i> | 821491 | no -10  | 38  |

|                    |                                                                 |         |         |     |
|--------------------|-----------------------------------------------------------------|---------|---------|-----|
| HP0781             | Orf                                                             | 835048  | overlap | 27  |
| HP0834             | GTP-binding protein homologue, <i>yphC</i>                      | 886026  | overlap | 40  |
| HP0833 (divergent) | Orf                                                             | 886026  | no -10  | 8   |
| HP0836             | Orf                                                             | 888287  | +123    | 150 |
| HP0850             | type I restriction enzyme M protein, <i>hsdM</i>                | 902769  | overlap | 78  |
| HP0851 (divergent) | integral membrane protein                                       | 902769  | no -10  | 77  |
| HP0871             | CDP-diglyceride hydrolase, <i>cdh</i>                           | 923613  | no -10  | 70  |
| HP0877             | Holliday junction endodeoxyribonuclease, <i>ruvC</i>            | 930302  | +35     | 85  |
| HP0877             | Holliday junction endodeoxyribonuclease, <i>ruvC</i>            | 930346  | overlap | 41  |
| HP0988             | IS605 transposase, <i>tnpA</i>                                  | 1051524 | no -10  | 16  |
| HP0989 (divergent) | IS605 transposase, <i>tnpB</i>                                  | 1051524 | overlap | 23  |
| HP0992             | Orf                                                             | 1054695 | +30     | 72  |
| HP0998             | IS605 transposase, <i>tnpA</i>                                  | 1061633 | no -10  | 16  |
| HP0989 (divergent) | IS605 transposase, <i>tnpB</i>                                  | 1061633 | overlap | 25  |
| HP1000             | partitioning protein A                                          | 1062609 | no -10  | 52  |
| HP1027             | Fur regulatory protein involved in iron homeostasis, <i>fur</i> | 1090112 | +19     | 72  |
| HP1041             | regulator of flagellar biogenesis, <i>flhA</i>                  | 1100822 | +21     | 77  |
| HP1043             | transcriptional regulator                                       | 1105495 | +6      | 51  |
| HP1096             | IS605 transposase, <i>tnpA</i>                                  | 1158033 | no -10  | 16  |
| HP1095 (divergent) | IS605 transposase, <i>tnpB</i>                                  | 1158033 | overlap | 25  |

|                    |                                                                 |         |         |     |
|--------------------|-----------------------------------------------------------------|---------|---------|-----|
| HP1100             | 6-phosphogluconate dehydratase                                  | 1162168 | overlap | 5   |
| HP1101 (divergent) | glucose-6-phosphate dehydrogenase                               | 1162168 | no -10  | 5   |
| HP1108             | pyruvate: ferredoxin oxidoreductase, gamma subunit, <i>porG</i> | 1170070 | +11     | 68  |
| HP1167             | Orf                                                             | 1232513 | no -10  | 62  |
| HP1192             | secreted protein involved in flagellar motility                 | 1263593 | overlap | 35  |
| HP1322             | Orf                                                             | 1382590 | no -10  | 102 |
| HP1394             | inorganic polyphosphate/ATP-NAD kinase                          | 1455874 | no -10  | 27  |
| HP1394             | inorganic polyphosphate/ATP-NAD kinase                          | 1455874 | no -10  | 80  |
| HP1395 (divergent) | outer membrane protein, <i>horL</i>                             | 1455874 | no -10  | 56  |
| HP1400             | iron(III) dicitrate transport protein, <i>fecA</i>              | 1461279 | no -10  | 125 |
| HP1460             | DNA polymerase III alpha-subunit, <i>dnaE</i>                   | 1532626 | +49     | 83  |
| HP1461(divergent)  | cytochrome c551 peroxidase                                      | 1532626 | overlap | 40  |
| HP1513             | selenocysteine synthase, <i>selA</i>                            | 1587195 | no -10  | 84  |
| HP1519             | Orf                                                             | 1595701 | no -10  | 13  |
| HP1526             | exodeoxyribonuclease, <i>lexA</i>                               | 1605865 | +29     | 61  |
| HP1535             | IS605 transposase, <i>tnpA</i>                                  | 1614310 | no -10  | 16  |
| HP1534 (divergent) | IS605 transposase, <i>tnpB</i>                                  | 1614310 | overlap | 25  |

<sup>a</sup> - position relevant to *H. pylori* 26695 genome

<sup>b</sup> - presence/absence of the - 10 element (TATAAT) and position relevant to - 10 element

<sup>c</sup> - positions relevant to the start of the protein coding sequence
